# Supplementary material
Source: HighWire-hosted journal article supplement (http://www.cmaj.ca/highwire/filestream/58660/field_highwire_adjunct_files/1/limit-good-2-at.pdf)
Supplement: limit-good-2-at.pdf [file limit-good-2-at.pdf]

**Appendix 2 (as supplied by the authors): Adjusted associations between the sociodemographic characteristics of the respondents and the six most prevalent conditions specified as causes of limitations**

| Characteristic                                    | Condition, OR (95% CI) |             |                        |             |               |             |              |             |           |             |
|---------------------------------------------------|------------------------|-------------|------------------------|-------------|---------------|-------------|--------------|-------------|-----------|-------------|
|                                                   | Musculoskeletal        |             | Cardio/cerebrovascular |             | Mental health |             | Neurological |             | Endocrine |             |
| Female (ref: male)                                | 1.74                   | (1.57–1.93) | 0.81                   | (0.69–0.95) | 1.33          | (1.13–1.58) | 1.19         | (0.98–1.43) | 0.96      | (0.77–1.18) |
| Nonwhite (ref: white)                             | 0.68                   | (0.57–0.82) | 1.13                   | (0.85–1.50) | 0.52          | (0.38–0.70) | 0.55         | (0.39–0.76) | 1.40      | (1.01–1.90) |
| Single/divorced (ref: Married/common-law)         | 0.84                   | (0.75–0.95) | 0.86                   | (0.69–1.06) | 2.19          | (1.82–2.64) | 1.10         | (0.89–1.34) | 1.24      | (0.99–1.62) |
| Widowed (ref: Married/common-law)                 | 1.12                   | (0.95–1.33) | 1.24                   | (1.00–1.53) | 1.65          | (0.99–2.76) | 0.87         | (0.62–1.24) | 1.06      | (0.80–1.55) |
| High school education (ref: < High school)        | 1.00                   | (0.88–1.15) | 0.90                   | (0.73–1.10) | 1.03          | (0.85–1.26) | 1.03         | (0.80–1.32) | 0.84      | (0.64–1.12) |
| > High school education (ref: < High school)      | 1.05                   | (0.93–1.18) | 0.85                   | (0.71–1.02) | 1.03          | (0.85–1.25) | 1.21         | (0.99–1.48) | 0.87      | (0.68–1.13) |
| Employed 1–39 h/w (ref: 0 h/w)                    | 0.81                   | (0.70–0.95) | 0.51                   | (0.38–0.70) | 0.60          | (0.49–0.73) | 0.67         | (0.51–0.87) | 0.62      | (0.45–0.85) |
| Employed 40 h/w (ref: 0 h/w)                      | 0.77                   | (0.67–0.89) | 0.48                   | (0.39–0.64) | 0.40          | (0.31–0.52) | 0.39         | (0.29–0.51) | 0.58      | (0.41–0.82) |
| Annual income \$35 378–\$72 756 (ref: < \$35 378) | 1.08                   | (0.94–1.24) | 0.77                   | (0.63–0.96) | 0.67          | (0.52–0.85) | 1.01         | (0.80–1.28) | 0.77      | (0.58–1.02) |
| Annual income > \$72 756 (ref: < \$35 378)        | 1.03                   | (0.79–1.34) | 0.94                   | (0.53–1.68) | 0.82          | (0.26–2.59) | 1.05         | (0.64–1.71) | 0.64      | (0.37–1.10) |
| Rural residence (ref: urban residence)            | 0.96                   | (0.86–1.07) | 1.04                   | (0.87–1.23) | 0.71          | (0.58–0.87) | 0.88         | (0.71–1.09) | 0.75      | (0.60–0.95) |
| Born outside of Canada (ref: born in Canada)      | 0.83                   | (0.72–0.94) | 0.97                   | (0.80–1.18) | 0.77          | (0.57–1.02) | 0.83         | (0.63–1.10) | 1.02      | (0.80–1.30) |
| Age 40–65 yr (ref: age < 39 yr)                   | 2.53                   | (2.17–2.88) | 3.78                   | (2.57–5.56) | 0.55          | (0.46–0.65) | 0.80         | (0.65–0.98) | 2.52      | (1.81–3.61) |
| Age > 65 yr (ref: < 39 yr)                        | 2.19                   | (1.88–2.57) | 6.49                   | (4.35–9.67) | 0.09          | (0.06–0.12) | 0.49         | (0.37–0.64) | 2.36      | (1.65–3.49) |
| Note: CI = confidence interval, OR = odds ratio.  |                        |             |                        |             |               |             |              |             |           |             |

Appendix to: Goodridge D, Lawson J, Marciniuk D, Rennie D. A population-based profile of adult Canadians living with participation and activity limitations. *CMAJ* 2011. DOI:10.1503/cmaj110153.

Copyright © 2011 Canadian Medical Association or its licensors.
